# Supplementary material for: A grape seed extract increases active glucagon-like peptide-1 levels after an oral glucose load in rats
Source: Royal Society of Chemistry journal article supplement (doi:10.1039/c4fo00447g), 2014-07-17
Supplement: c4fo00447g1.pdf [file c4fo00447g1.pdf]

### Supplemental Data (Online Appendix)

**Table 1.** Initial composition of apical cell culture media with 250 mg of GSPE/L.

| Compound                                 | Total amount ( $\mu\text{M}$ ) | Total amount (mg/g) |
|------------------------------------------|--------------------------------|---------------------|
| Catechin                                 | 60.47                          | 70.21               |
| Epicatechin                              | 62.53                          | 72.61               |
| Procyanidin Dimer <sup>(3)</sup>         | 32.93                          | 76.20               |
| Gallic acid                              | 5.71                           | 3.88                |
| Epicatechin gallate <sup>(4)</sup>       | 5.49                           | 9.71                |
| Epigallocatechin <sup>(4)</sup>          | n.q.                           | n.q.                |
| Procyanidin Trimer <sup>(3)</sup>        | 3.24                           | 11.22               |
| Procyanidin Tetramer <sup>(3)</sup>      | n.q.                           | n.q.                |
| Procyanidin Pentamer <sup>(3)</sup>      | n.d.                           | n.d.                |
| EGCG                                     | n.q.                           | n.q.                |
| Procyanidin dimer gallate <sup>(3)</sup> | n.q.                           | n.q.                |

**n.d.= not detected. n.q.= not quantified. EGCG = Epigallocatechin Gallate**

<sup>1</sup> Quantified as Catechin

<sup>2</sup> Quantified as Epicatechin

<sup>3</sup> Quantified as Dimer B2

<sup>4</sup> Quantified as EGCG
